# Supplementary material for: Structure-based design, synthesis, and biological evaluation of novel piperine–resveratrol hybrids as antiproliferative agents targeting SIRT-2
Source: Royal Society of Chemistry journal article supplement (doi:10.1039/d1ra04061h), 2021-01-01
Supplement: d1ra04061h2.pdf [file d1ra04061h2.pdf]

# **Structure-based Design, Synthesis, and Biological Evaluation of Novel Piperine-Resveratrol Hybrids as Antiproliferative Agents Targeting SIRT-2**

**Ahmed H. Tantawy<sup>1,2,3\*</sup>, Xiang-Gao Meng<sup>4\*</sup>, Adel A. Marzouk<sup>5</sup>, Ali Fouad<sup>5</sup>,  
Ahmed H. Abdelazeem<sup>6,7</sup>, Bahaa G. M. Youssif<sup>8</sup>, Hong Jiang<sup>2\*</sup>, Man-Qun  
Wang<sup>1\*</sup>**

<sup>1</sup>Hubei Insect Resources Utilization and Sustainable Pest Management Key Laboratory, College of Plant Science and Technology, Huazhong Agricultural University, Wuhan 430070, People's Republic of China, <sup>2</sup>Department of Chemistry, College of Science, Huazhong Agricultural University, Wuhan, 430070, China, <sup>3</sup>Department of Chemistry, College of Science, Benha University, Benha 13518, Egypt; <sup>4</sup>Key Laboratory of Pesticide and Chemical Biology, Ministry of Education, and School of Chemistry, Central China Normal University, Wuhan 430079, China; <sup>5</sup>Department of Pharmaceutical Chemistry, Faculty of Pharmacy, Al-Azhar University, Assiut Branch, Assiut-71524, Egypt; <sup>6</sup>Department of Medicinal Chemistry, Faculty of pharmacy, Beni-Suef University, Beni-Suef 62514, Egypt; <sup>7</sup>Department of Pharmaceutical Sciences, College of Pharmacy, Riyadh Elm University, Riyadh 11681, Saudi Arabia; <sup>8</sup>Pharmaceutical Organic Chemistry Department, Faculty of Pharmacy, Assiut University, Assiut 71526, Egypt.

## Supporting information

### Table of Contents

|                                                                                                                                                                                                                                                                                                                                                                      |                   |
|----------------------------------------------------------------------------------------------------------------------------------------------------------------------------------------------------------------------------------------------------------------------------------------------------------------------------------------------------------------------|-------------------|
| IR, $^1\text{H}$ and $^{13}\text{C}$ NMR spectra of compound <b>5a</b>                                                                                                                                                                                                                                                                                               | <b>Figure S1</b>  |
| $^1\text{H}$ and $^{13}\text{C}$ NMR spectra of compound <b>5b</b>                                                                                                                                                                                                                                                                                                   | <b>Figure S2</b>  |
| IR, $^1\text{H}$ and $^{13}\text{C}$ NMR spectra of compound <b>5c</b>                                                                                                                                                                                                                                                                                               | <b>Figure S3</b>  |
| IR, $^1\text{H}$ and $^{13}\text{C}$ NMR spectra of compound <b>5d</b>                                                                                                                                                                                                                                                                                               | <b>Figure S4</b>  |
| IR, $^1\text{H}$ and $^{13}\text{C}$ NMR spectra of compound <b>5e</b> (reported)                                                                                                                                                                                                                                                                                    | <b>Figure S5</b>  |
| IR, $^1\text{H}$ and $^{13}\text{C}$ NMR spectra of compound <b>5f</b>                                                                                                                                                                                                                                                                                               | <b>Figure S6</b>  |
| IR, $^1\text{H}$ and $^{13}\text{C}$ NMR spectra of compound <b>5g</b>                                                                                                                                                                                                                                                                                               | <b>Figure S7</b>  |
| IR, $^1\text{H}$ and $^{13}\text{C}$ NMR spectra of compound <b>5h</b>                                                                                                                                                                                                                                                                                               | <b>Figure S8</b>  |
| ➤ Hirschfield surfaces in <b>5a</b> mapped with (a) $d_{norm}$ ; (b) Shape index, (c) full fingerprint plot; (d) $\text{H}\cdots\text{O}$ contacts ( $\text{O}-\text{H}\cdots\text{O}$ and $\text{C}-\text{H}\cdots\text{O}$ ); (e) $\text{H}\cdots\text{C}$ contacts ( $\text{C}-\text{H}\cdots\pi$ ) and (f) $\text{C}\cdots\text{C}$ contacts ( $\pi\cdots\pi$ ). | <b>Figure S9</b>  |
| ➤ Hirschfield surfaces in <b>5c</b> mapped with (a) $d_{norm}$ ; (b) Shape index, (c) full fingerprint plot; (d) $\text{H}\cdots\text{O}$ contacts ( $\text{O}-\text{H}\cdots\text{O}$ and $\text{C}-\text{H}\cdots\text{O}$ ); (e) $\text{H}\cdots\text{C}$ contacts ( $\text{C}-\text{H}\cdots\pi$ ) and (f) $\text{C}\cdots\text{C}$ contacts ( $\pi\cdots\pi$ ). | <b>Figure S10</b> |
| ➤ Hirschfield surfaces in <b>5d</b> mapped with (a) $d_{norm}$ ; (b) Shape index, (c) full fingerprint plot; (d) $\text{H}\cdots\text{O}$ contacts ( $\text{O}-\text{H}\cdots\text{O}$ and $\text{C}-\text{H}\cdots\text{O}$ ); (e) $\text{H}\cdots\text{C}$ contacts ( $\text{C}-\text{H}\cdots\pi$ ) and (f) $\text{C}\cdots\text{C}$ contacts ( $\pi\cdots\pi$ ). | <b>Figure S11</b> |
| ➤ Hirschfield surfaces in <b>5e</b> mapped with (a) $d_{norm}$ ; (b) Shape index, (c) full fingerprint plot; (d) $\text{H}\cdots\text{O}$ contacts ( $\text{O}-\text{H}\cdots\text{O}$ and $\text{C}-\text{H}\cdots\text{O}$ ); (e) $\text{H}\cdots\text{C}$ contacts ( $\text{C}-\text{H}\cdots\pi$ ) and (f) $\text{C}\cdots\text{C}$ contacts ( $\pi\cdots\pi$ ). | <b>Figure S12</b> |
| ➤ Hirschfield surfaces in <b>5f</b> mapped with (a) $d_{norm}$ ; (b) Shape index, (c) full fingerprint plot; (d) $\text{H}\cdots\text{O}$ contacts ( $\text{O}-\text{H}\cdots\text{O}$ and $\text{C}-\text{H}\cdots\text{O}$ ); (e) $\text{H}\cdots\text{C}$ contacts ( $\text{C}-\text{H}\cdots\pi$ ) and (f) $\text{C}\cdots\text{C}$ contacts ( $\pi\cdots\pi$ ). | <b>Figure S13</b> |
| The crystallographic data and structure refinement for <b>5a-f</b>                                                                                                                                                                                                                                                                                                   | <b>Table S1</b>   |



Figure S2

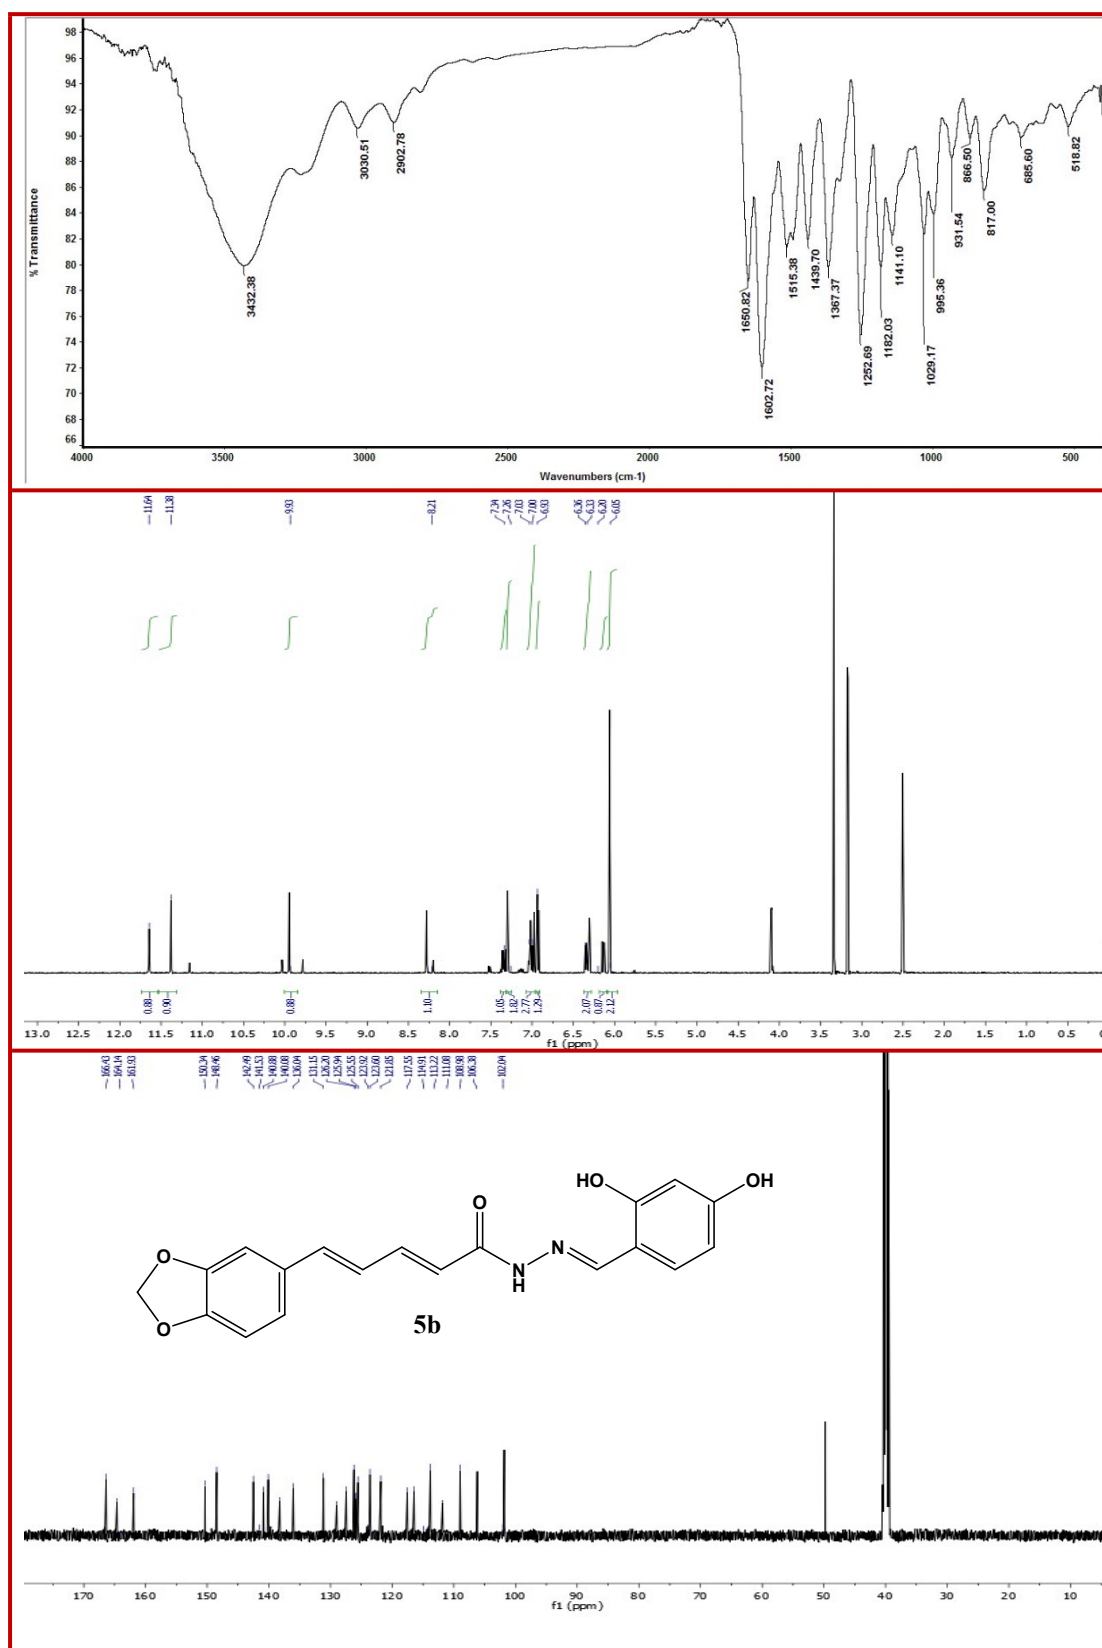

Figure S3

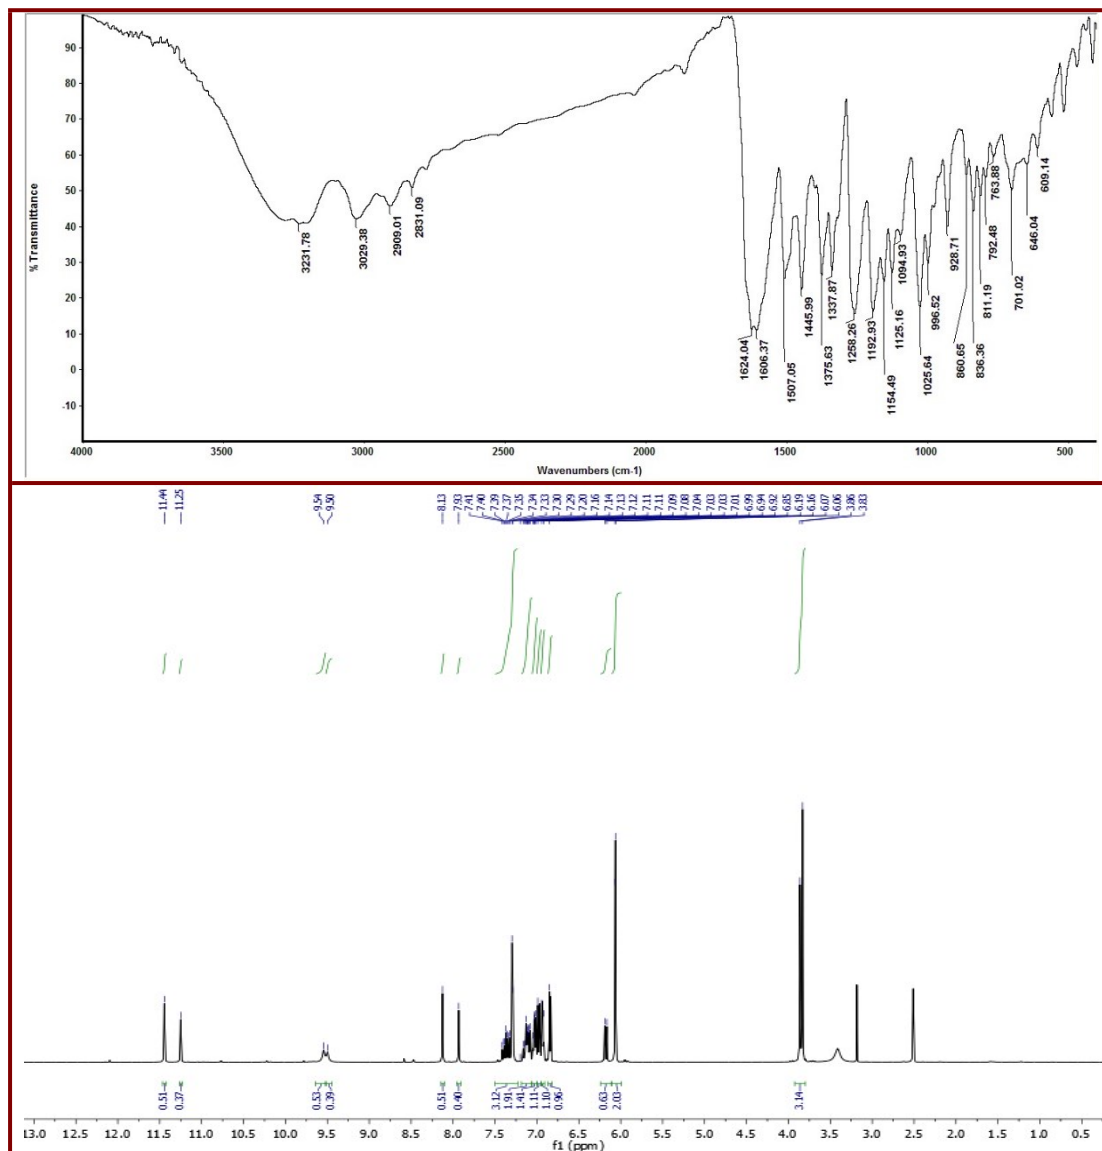

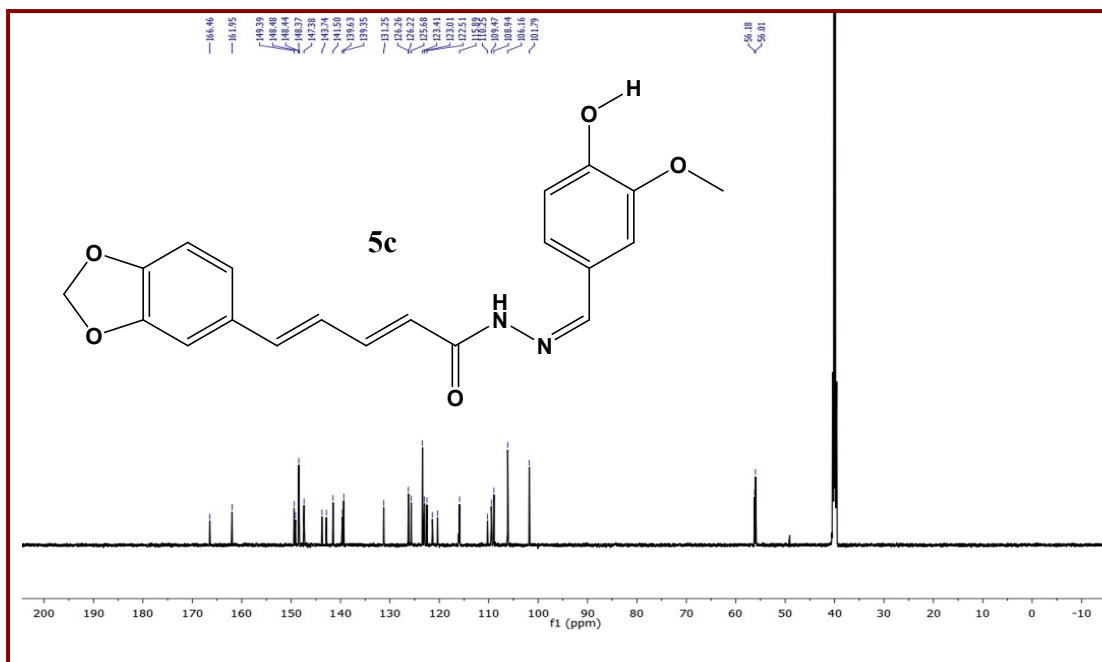

Figure S4

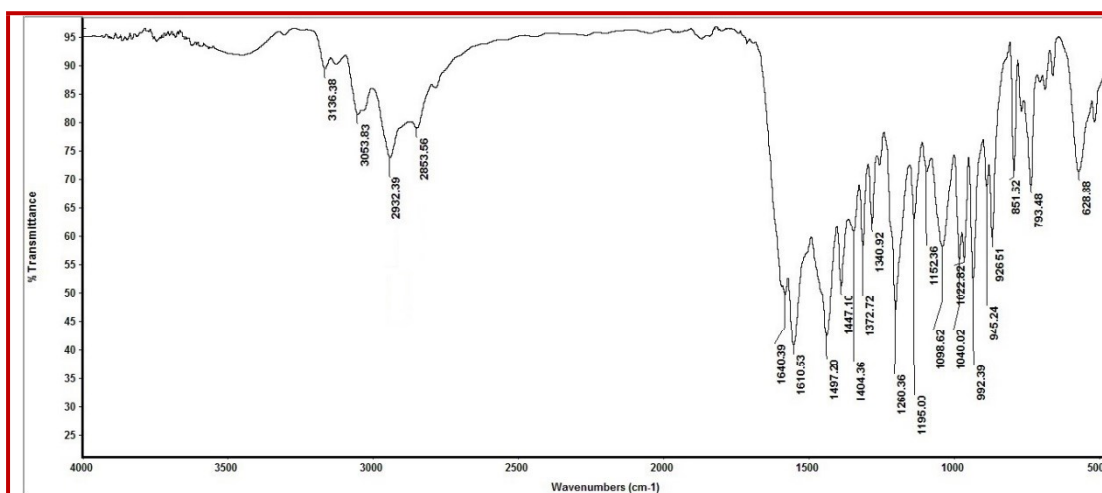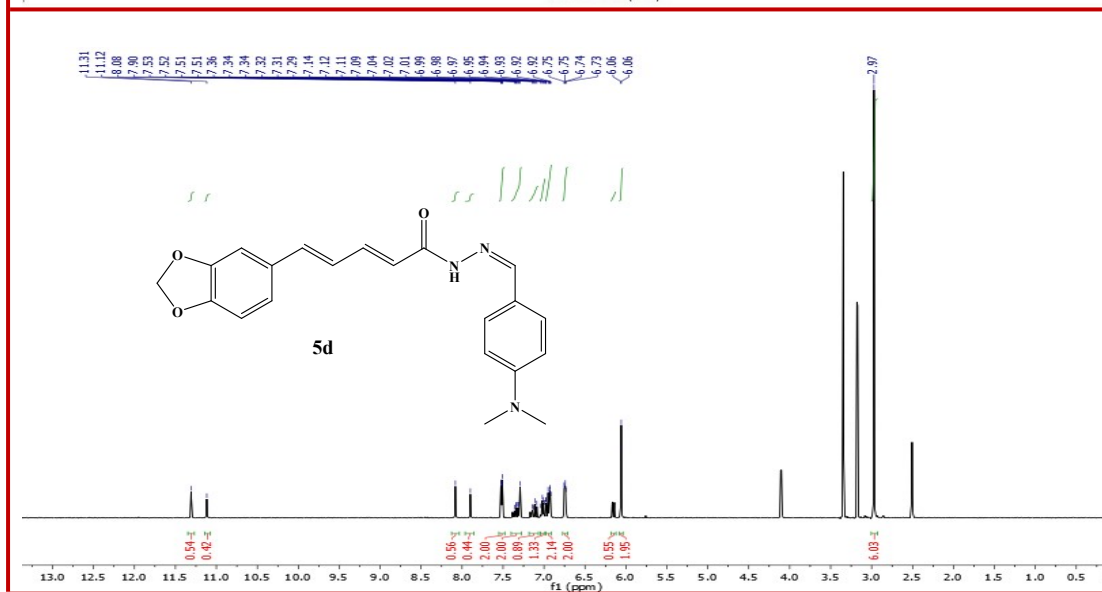

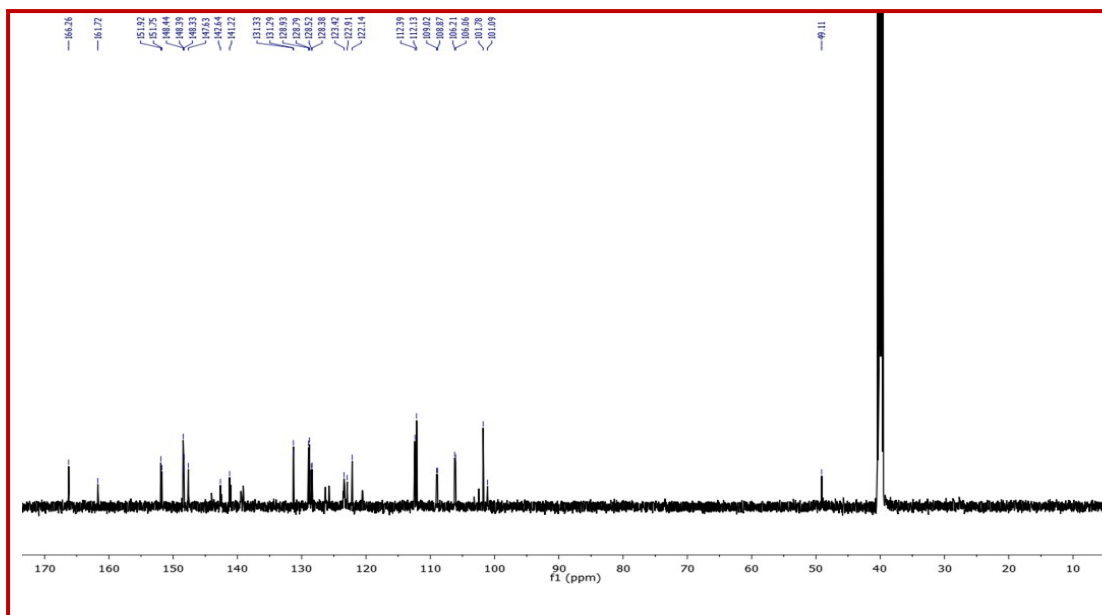

Figure S5

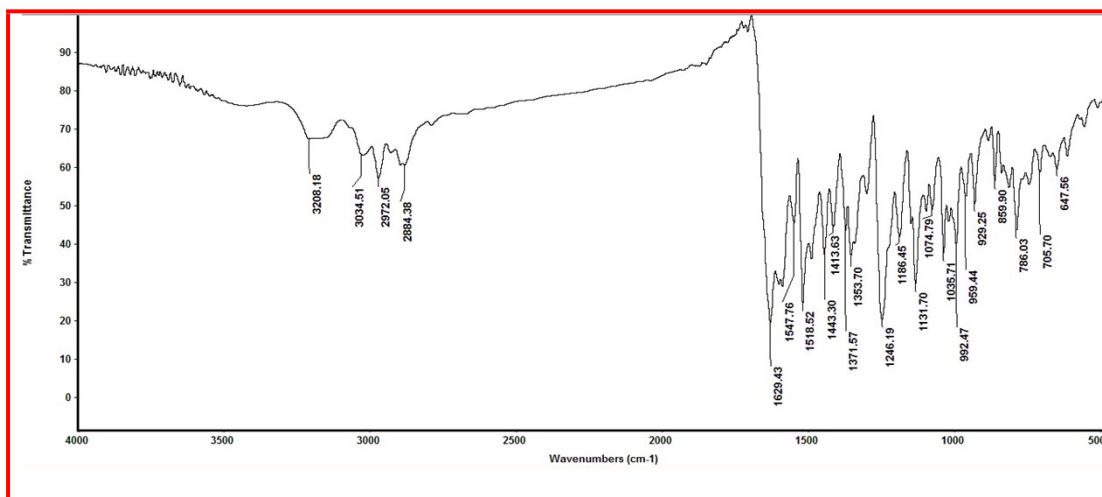

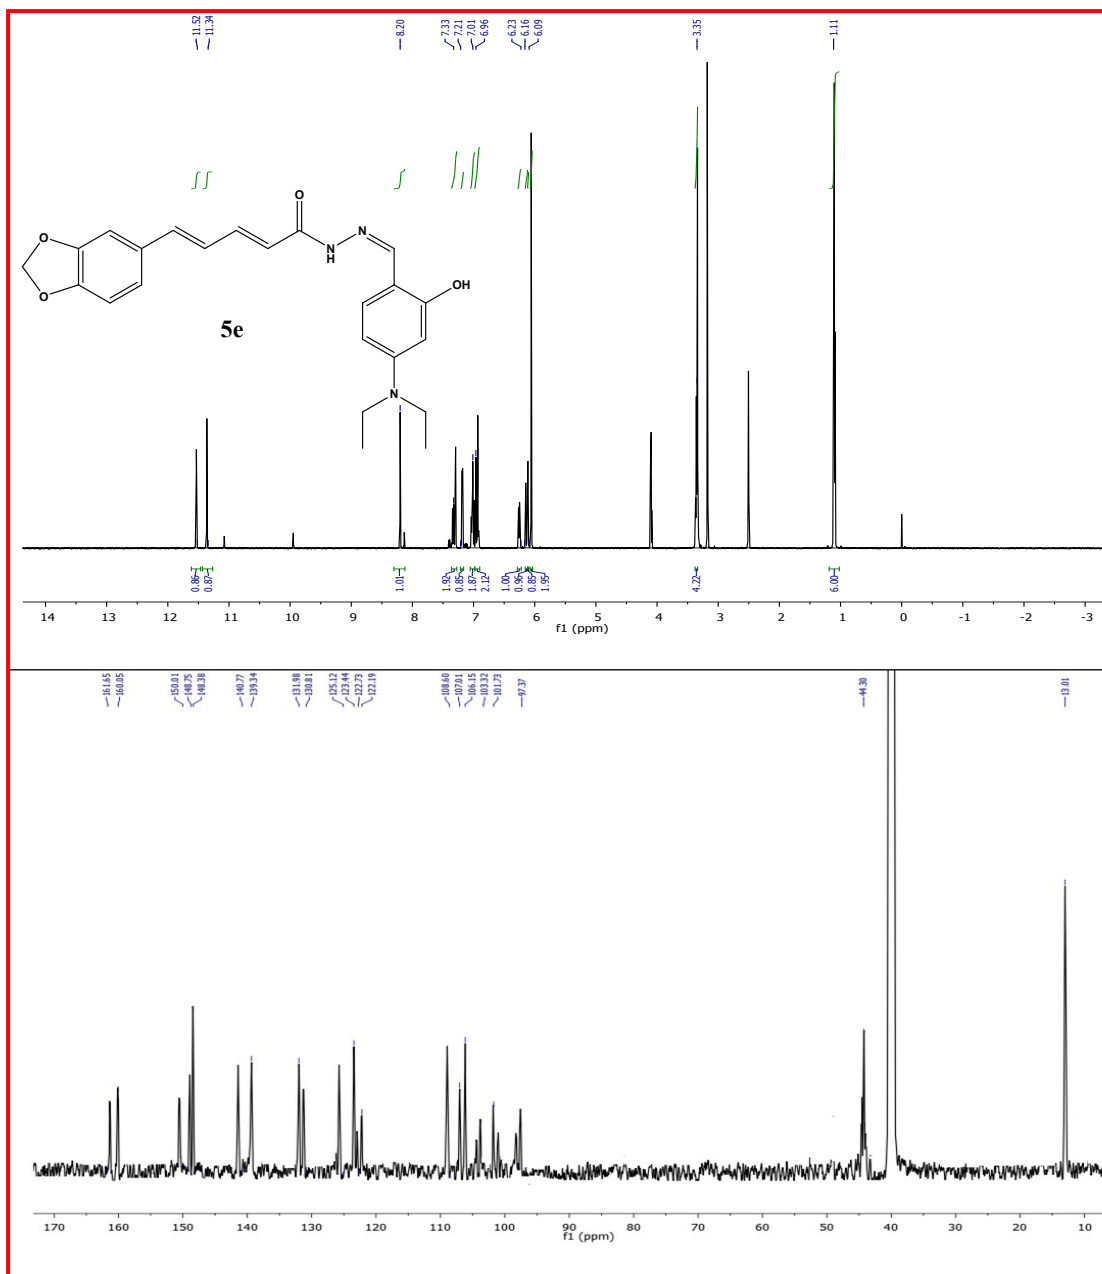

Figure S6



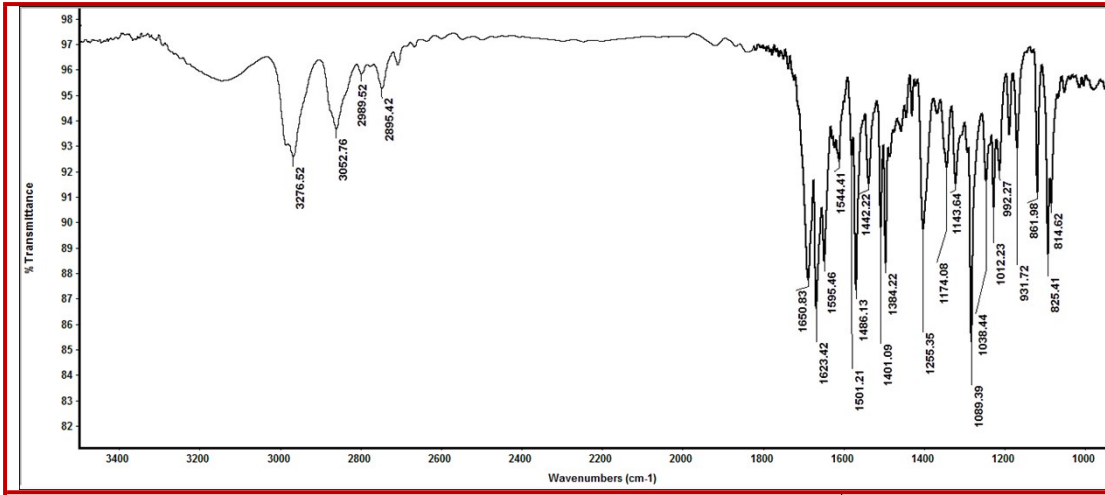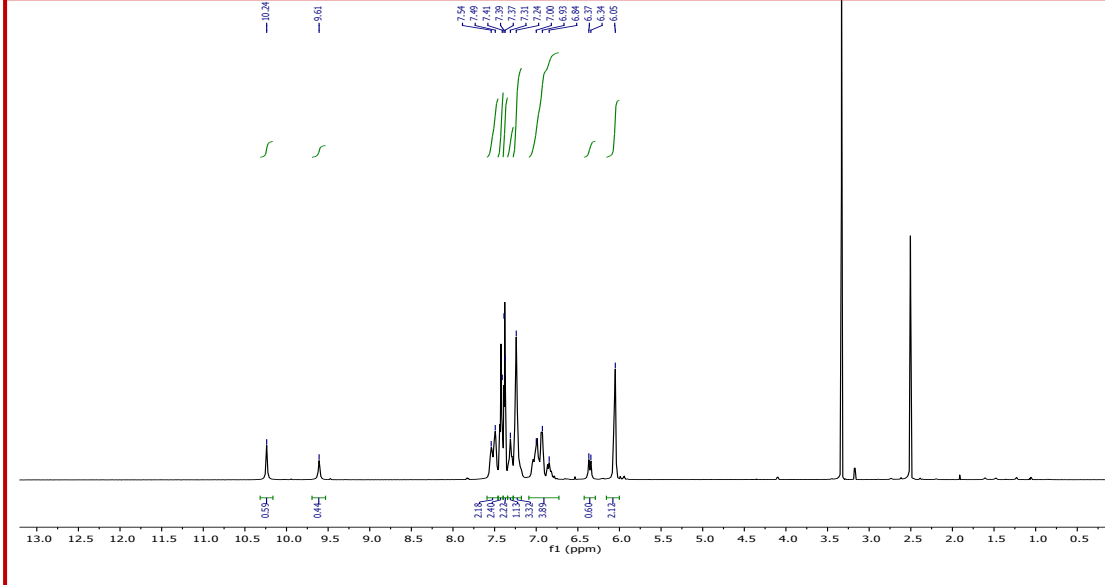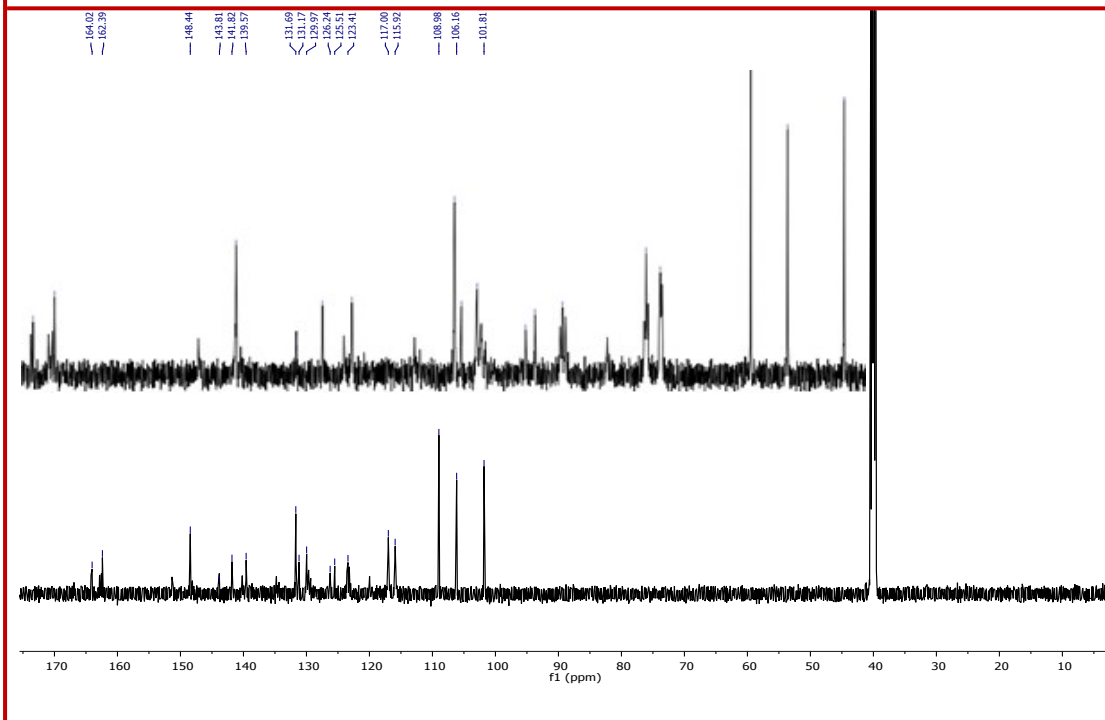

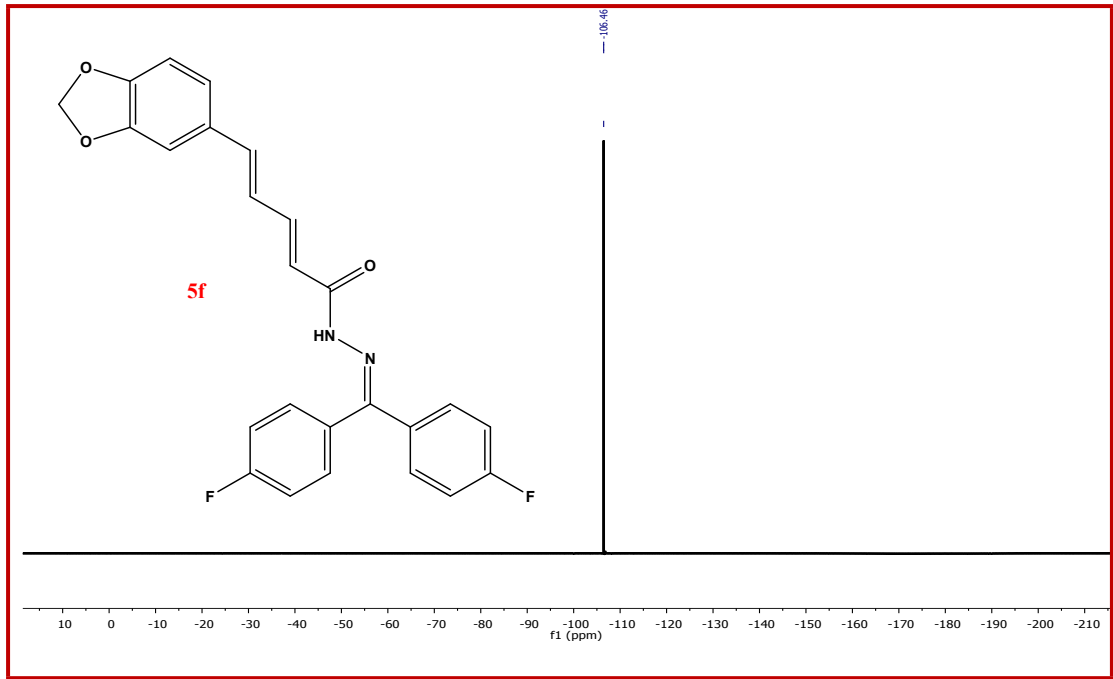

Figure S7

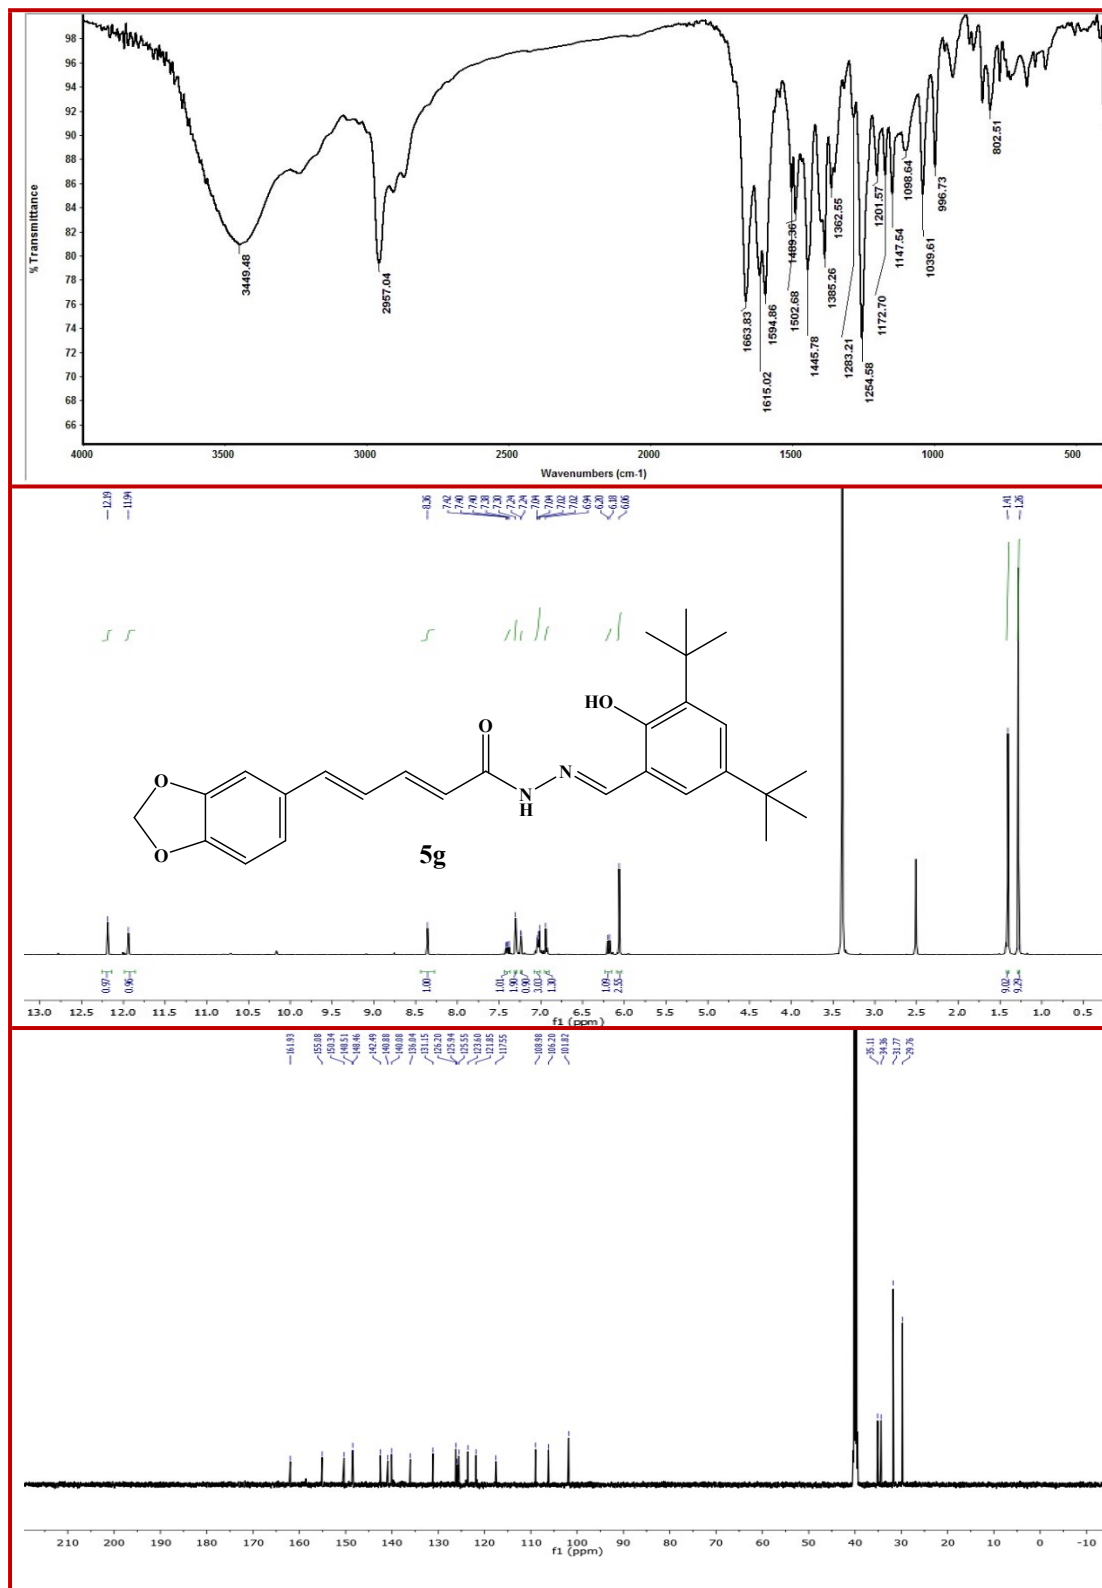

Figure S8

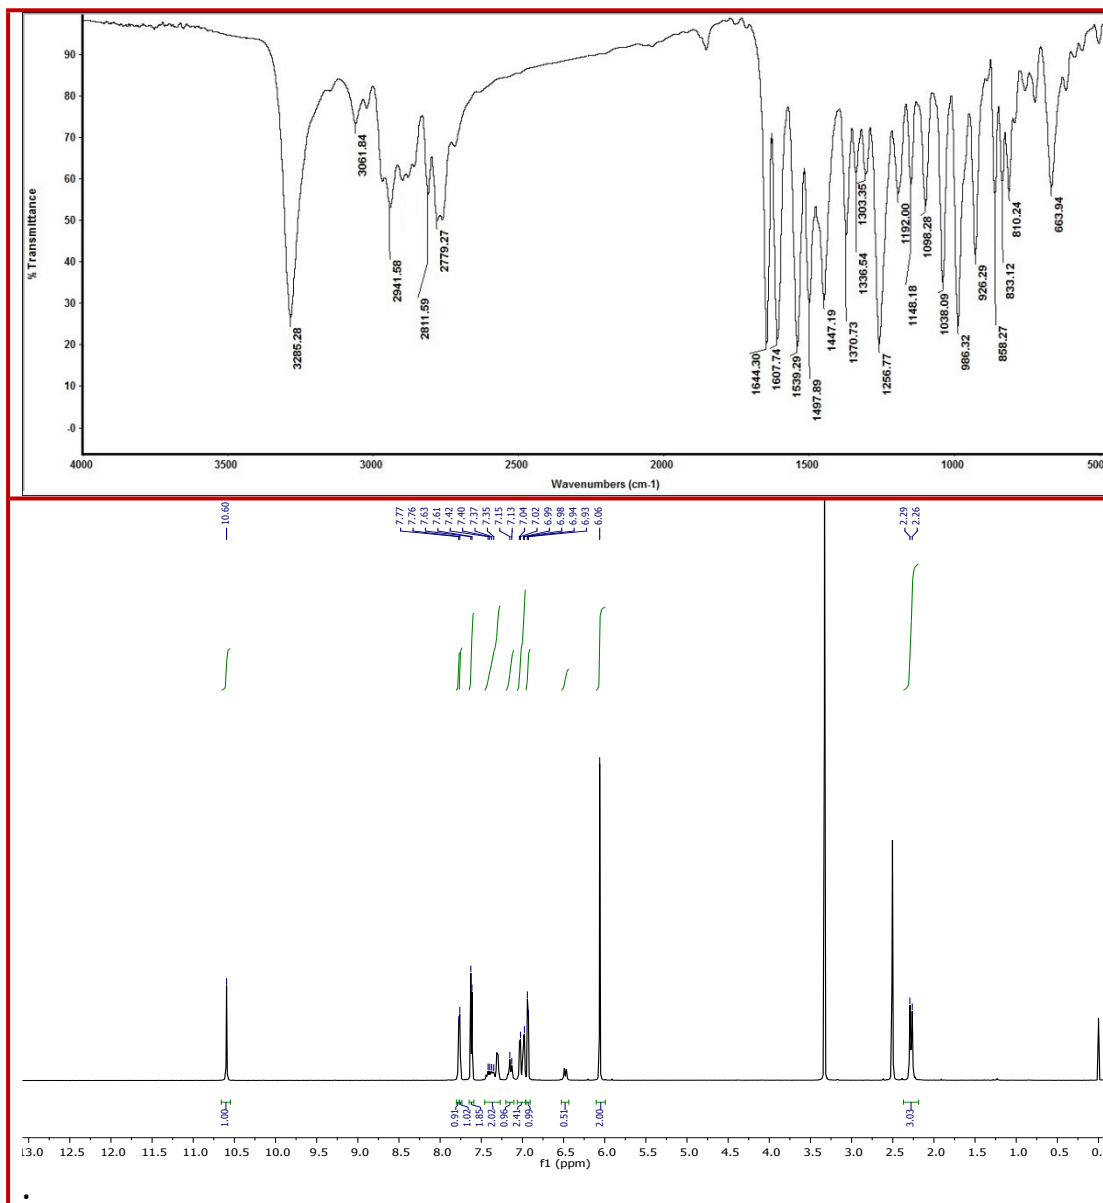

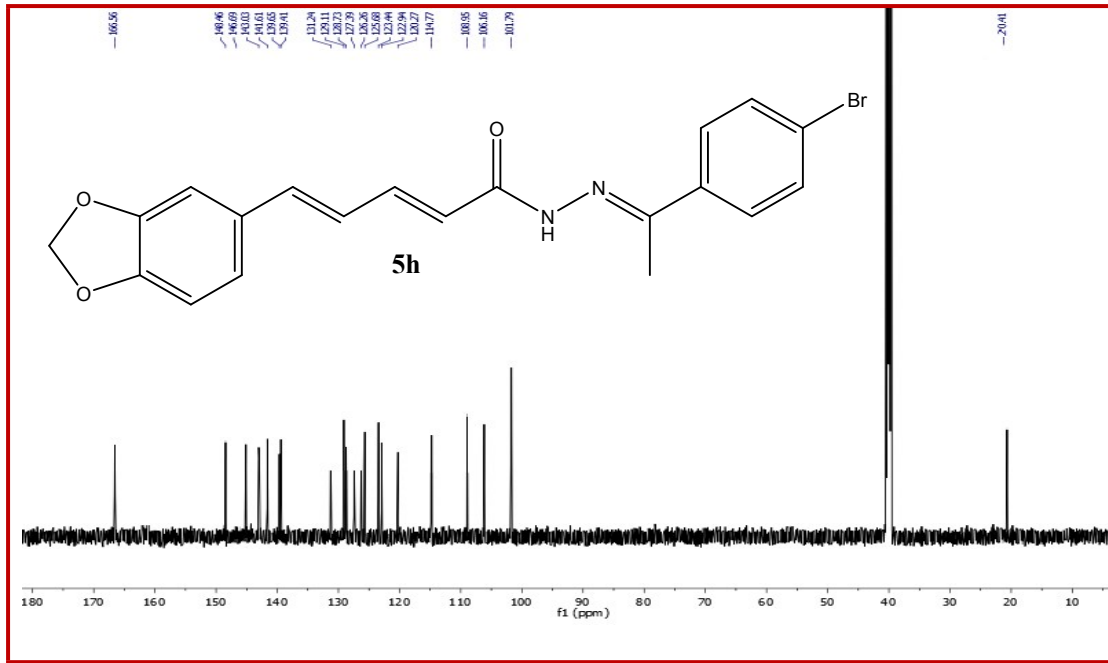

Figure S9

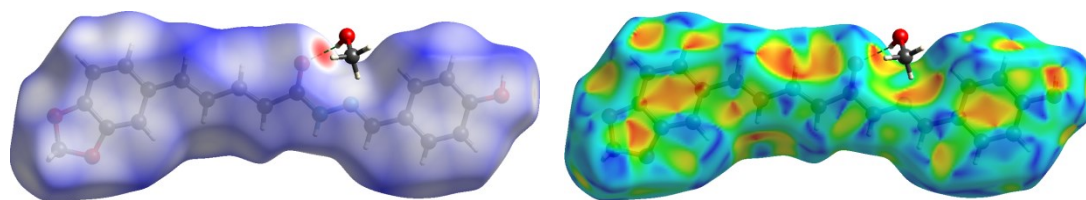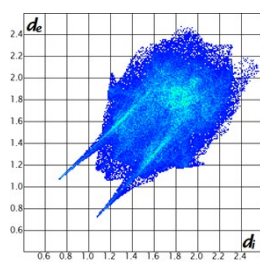

(c)

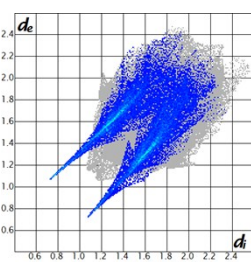

(d)

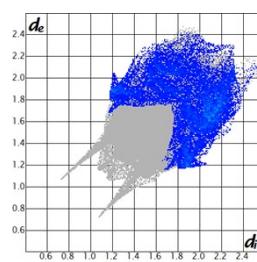

(e)

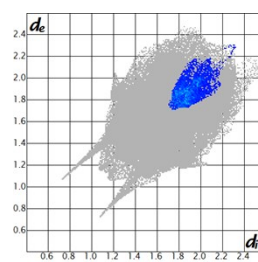

(f)

Figure S10

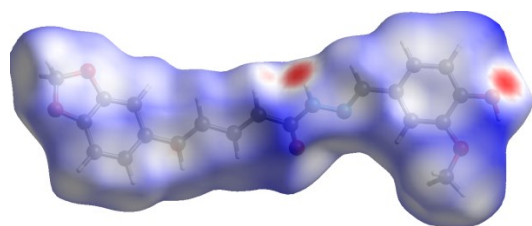

(a)

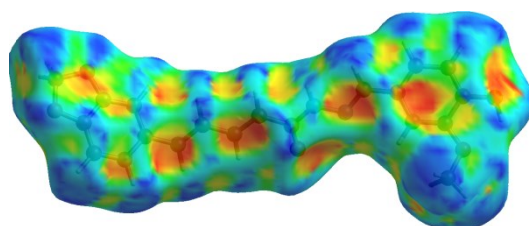

(b)

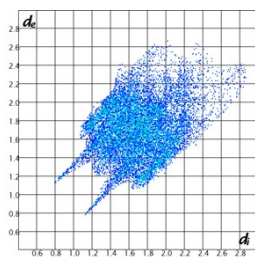

(c)

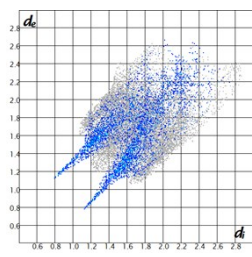

(d)

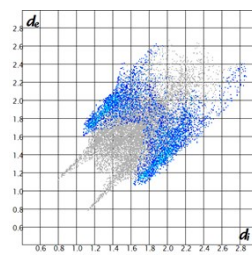

(e)

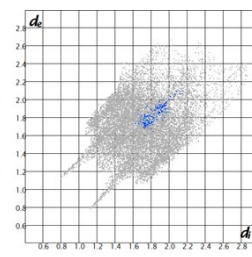

(f)

Figure S11

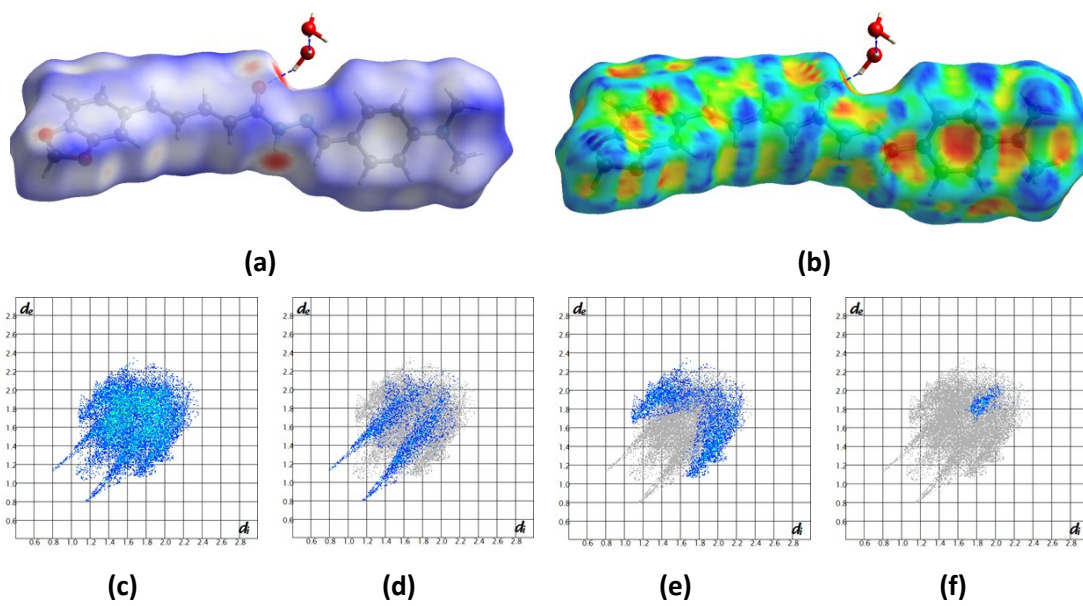



Figure S12

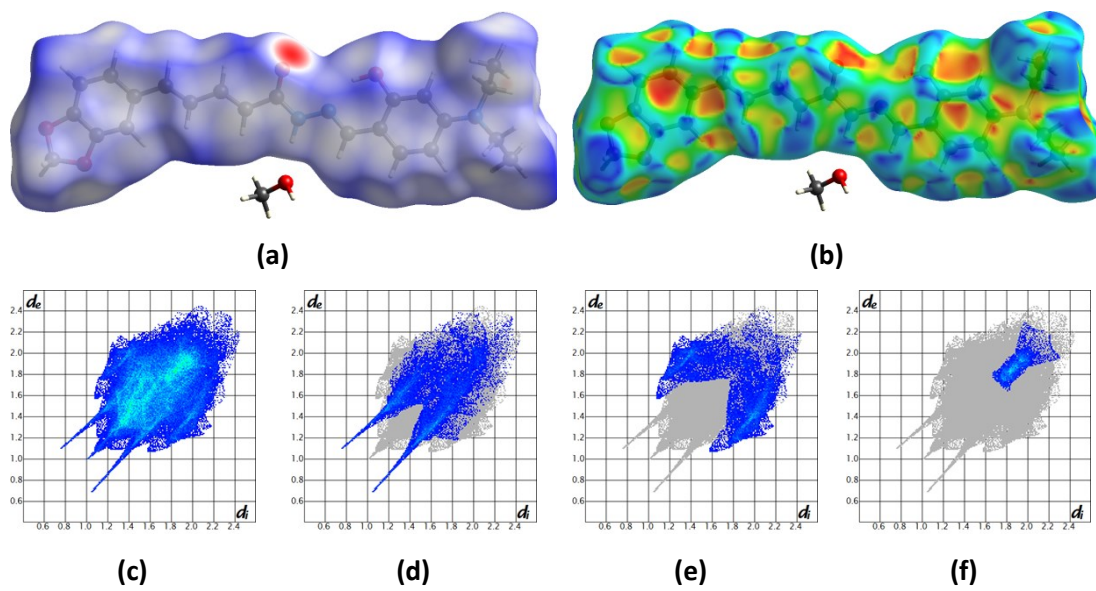

Figure S13

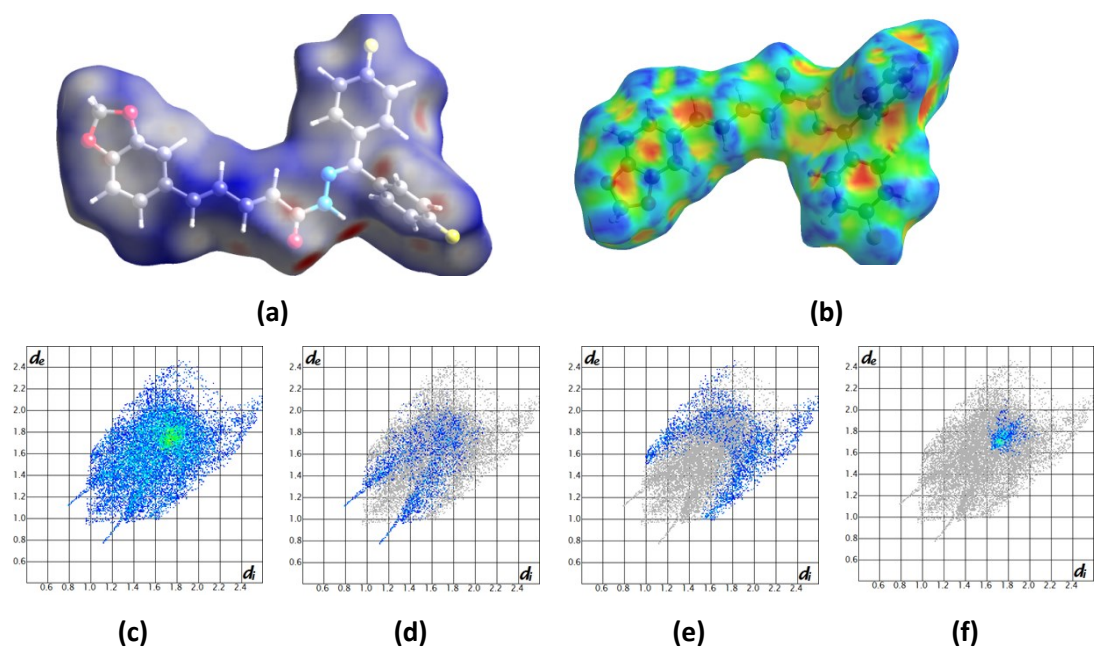

**Table S1**

|                                              | <b>5a</b>                                                     | <b>5b</b>                                                     | <b>5c</b>                                                     | <b>5d</b>                                                           | <b>5e</b>                                                     | <b>5f</b>                                                                    |
|----------------------------------------------|---------------------------------------------------------------|---------------------------------------------------------------|---------------------------------------------------------------|---------------------------------------------------------------------|---------------------------------------------------------------|------------------------------------------------------------------------------|
| Empirical formula                            | C <sub>20</sub> H <sub>20</sub> N <sub>2</sub> O <sub>5</sub> | C <sub>20</sub> H <sub>20</sub> N <sub>2</sub> O <sub>6</sub> | C <sub>20</sub> H <sub>18</sub> N <sub>2</sub> O <sub>5</sub> | C <sub>21</sub> H <sub>24.75</sub> N <sub>3</sub> O <sub>4.42</sub> | C <sub>24</sub> H <sub>29</sub> N <sub>3</sub> O <sub>5</sub> | C <sub>25</sub> H <sub>18</sub> F <sub>2</sub> N <sub>2</sub> O <sub>3</sub> |
| Formula weight                               | 368.38                                                        | 384.38                                                        | 366.36                                                        | 389.87                                                              | 439.50                                                        | 432.41                                                                       |
| Crystal system                               | Monoclinic                                                    | Monoclinic                                                    | Monoclinic                                                    | Monoclinic                                                          | Monoclinic                                                    | Triclinic                                                                    |
| Space group                                  | <i>P2<sub>1</sub>/c</i>                                       | <i>P2<sub>1</sub>/c</i>                                       | <i>P2<sub>1</sub>/c</i>                                       | <i>P2<sub>1</sub>/c</i>                                             | <i>P2<sub>1</sub>/c</i>                                       | <i>P-1</i>                                                                   |
| Unit cell dimensions                         |                                                               |                                                               |                                                               |                                                                     |                                                               |                                                                              |
| a (Å)                                        | 10.9249(5)                                                    | 6.6192(6)                                                     | 18.1988(7)                                                    | 13.6957(16)                                                         | 11.298(3)                                                     | 5.329(3)                                                                     |
| b (Å)                                        | 6.5740(3)                                                     | 19.7039(17)                                                   | 4.8105(2)                                                     | 6.3687(7)                                                           | 13.398(3)                                                     | 10.708(5)                                                                    |
| c (Å)                                        | 25.7341(11)                                                   | 14.2723(13)                                                   | 22.1672(8)                                                    | 24.058(3)                                                           | 15.678(4)                                                     | 15.496(7)                                                                    |
| α (°)                                        | 90                                                            | 90                                                            | 90                                                            | 90                                                                  | 90                                                            | 83.878(9)                                                                    |
| β (°)                                        | 94.790(3)                                                     | 99.079(5)                                                     | 112.874(3)                                                    | 104.090(6)                                                          | 107.247(4)                                                    | 87.608(9)                                                                    |
| γ (°)                                        | 90                                                            | 90                                                            | 90                                                            | 90                                                                  | 90                                                            | 82.240(9)                                                                    |
| Volume (Å <sup>3</sup> )                     | 1841.78(14)                                                   | 1838.1(3)                                                     | 1788.03(13)                                                   | 2035.3(4)                                                           | 2266.5(10)                                                    | 870.8(7)                                                                     |
| Z                                            | 4                                                             | 4                                                             | 4                                                             | 4                                                                   | 4                                                             | 4                                                                            |
| Calc. density (Mg/m <sup>3</sup> )           | 1.329                                                         | 1.389                                                         | 1.361                                                         | 1.272                                                               | 1.288                                                         | 1.649                                                                        |
| F(000)                                       | 776                                                           | 808                                                           | 768                                                           | 828.0                                                               | 936                                                           | 448                                                                          |
| Crystal size (mm)                            | 0.12 x 0.1 x 0.1                                              | 0.13 x 0.12 x 0.1                                             | 0.12 x 0.1 x 0.1                                              | 0.12 × 0.04 × 0.03                                                  | 0.15 x 0.15 x 0.1                                             | 0.20×0.12×0.10                                                               |
| θ range (°)                                  | 3.447 - 64.989                                                | 3.856 - 64.992                                                | 2.635 - 65.921                                                | 6.808-115.404                                                       | 1.887 - 26.372                                                | 2.23 -25.00                                                                  |
| Reflections collected                        | 10352                                                         | 10609                                                         | 14927                                                         | 9153                                                                | 17545                                                         | 6085                                                                         |
| Independent reflections                      | 3035                                                          | 2973                                                          | 3069                                                          | 2692                                                                | 4630                                                          | 3045                                                                         |
| Number of parameters/R <sub>int</sub>        | 248 /0.0865                                                   | 258/0.0552                                                    | 247/0.0601                                                    | 273/0.0786                                                          | 295/0.0604                                                    | 290/0.0520                                                                   |
| Goof %                                       | 1.026                                                         | 1.074                                                         | 1.072                                                         | 1.029                                                               | 1.037                                                         | 1.052                                                                        |
| Final R indices [I > 2σ(I)]                  | R1 = 0.0925<br>wR2 = 0.2368                                   | R <sub>1</sub> = 0.0461<br>wR <sub>2</sub> = 0.1239           | R <sub>1</sub> = 0.0490<br>wR <sub>2</sub> = 0.1431           | R <sub>1</sub> = 0.0706<br>wR <sub>2</sub> = 0.1880                 | R <sub>1</sub> = 0.0475<br>wR <sub>2</sub> = 0.1263           | R <sub>1</sub> = 0.0623<br>wR <sub>2</sub> = 0.1690                          |
| R indices (all data)                         | R1 = 0.1011<br>wR2 = 0.2530                                   | R <sub>1</sub> = 0.0507<br>wR <sub>2</sub> = 0.1332           | R <sub>1</sub> = 0.0687<br>wR <sub>2</sub> = 0.1575           | R <sub>1</sub> = 0.1081<br>wR <sub>2</sub> = 0.2150                 | R <sub>1</sub> = 0.0948<br>wR <sub>2</sub> = 0.1535           | R <sub>1</sub> = 0.0965<br>wR <sub>2</sub> = 0.1941                          |
| Max. diff. peak and hole (eÅ <sup>-3</sup> ) | 0.332, -0.362                                                 | 0.285, -0.225                                                 | 0.215, -0.171                                                 | 0.23, -0.19                                                         | 0.257, -0.164                                                 | 0.241, -0.241                                                                |
